# Supplementary material for: Roadside Exposure and Inflammation Biomarkers among a Cohort of Traffic Police in Kathmandu, Nepal
Source: MDPI journal article supplement (doi:10.3390/ijerph16030377), 2019-01-29
Supplement: s1 [file s1]

## **Supplementary Information**

Roadside exposure and inflammation biomarkers among a cohort of traffic police  
in Kathmandu, Nepal

Kabindra M. Shakya<sup>1</sup>, Richard E. Peltier<sup>2</sup>, Yimin Zhang<sup>3</sup>, Basu D. Pandey<sup>4</sup>

<sup>1</sup>Department of Geography and the Environment, Villanova University, Pennsylvania

<sup>2</sup>Department of Environmental Health Science, University of Massachusetts, Amherst

<sup>3</sup>Department of Mathematics and Statistics, Villanova University, Pennsylvania

<sup>4</sup>Sukraraj Tropical and Infectious Disease Hospital, Kathmandu and Everest International Clinic  
and Research Center, Nepal

<sup>1</sup>Corresponding author

800 Lancaster Avenue, Villanova, PA 19085, USA

Email: kabindra.shakya@villanova.edu

Phone: 610-519-3590

Fax: 610-519-3338

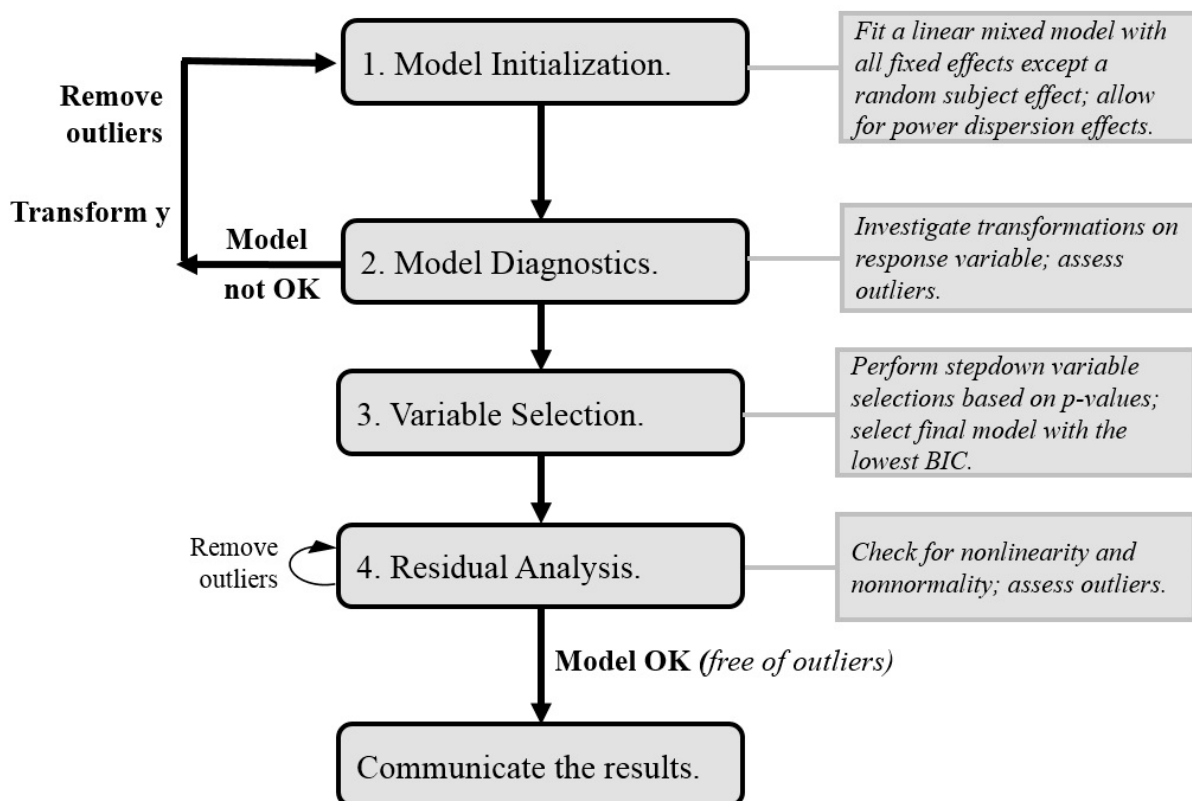

Figure S1. Strategy diagram for building linear mixed models.

Table S1. Variation of personal air pollution exposure at six sites between two seasons.

| Site       | PM <sub>2.5</sub> |               | BC           |              |
|------------|-------------------|---------------|--------------|--------------|
|            | Spring            | Summer        | Spring       | Summer       |
| Balaju     | 144.44 ± 29.94    | 65.69 ± 22.55 | 22.61 ± 4.76 | 20.19 ± 7.63 |
| Chabahil   | 130.82 ± 23.73    | 48.92 ± 21.84 | 23.90 ± 9.05 | 14.71 ± 7.47 |
| Jawalakhel | 92.22 ± 44.98     | 44.43 ± 23.21 | 14.10 ± 2.28 | 15.72 ± 7.03 |
| Kalanki    | 168.21 ± 28.41    | -             | 18.60 ± 3.23 | -            |
| Thapathali | 108.39 ± 28.79    | 24.33 ± 63.38 | 11.97 ± 5.88 | 12.37 ± 5.70 |

Mean and one standard deviation of 24-hour average of exposure for the personnel who volunteered to provide blood samples.
